# Supplementary material
Source: PubMed Central journal article supplement (PMC2829160)

**a**

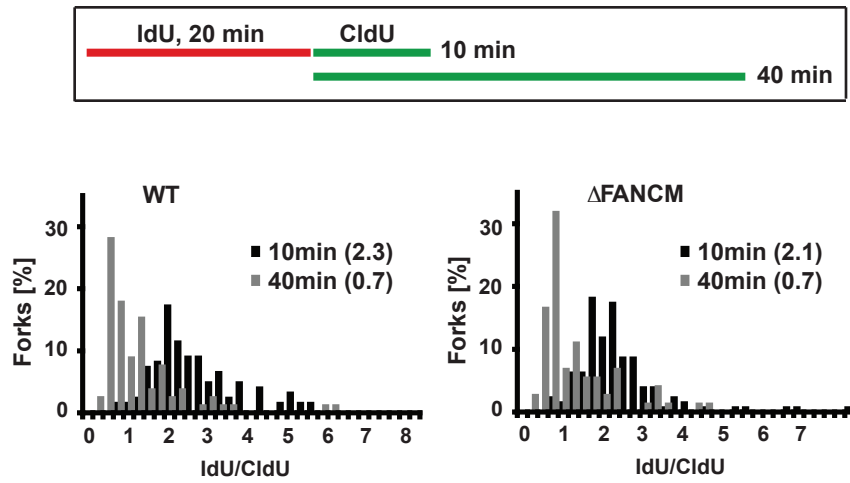

**b**

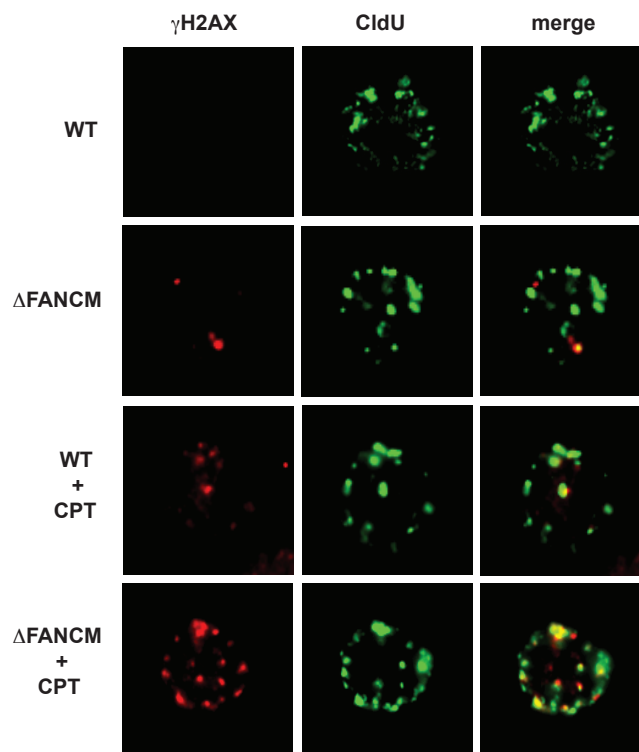

Supplementary Fig-1 Niedzwiedz

Supplement: emboj2009385s1.pdf [file emboj2009385s1.pdf]

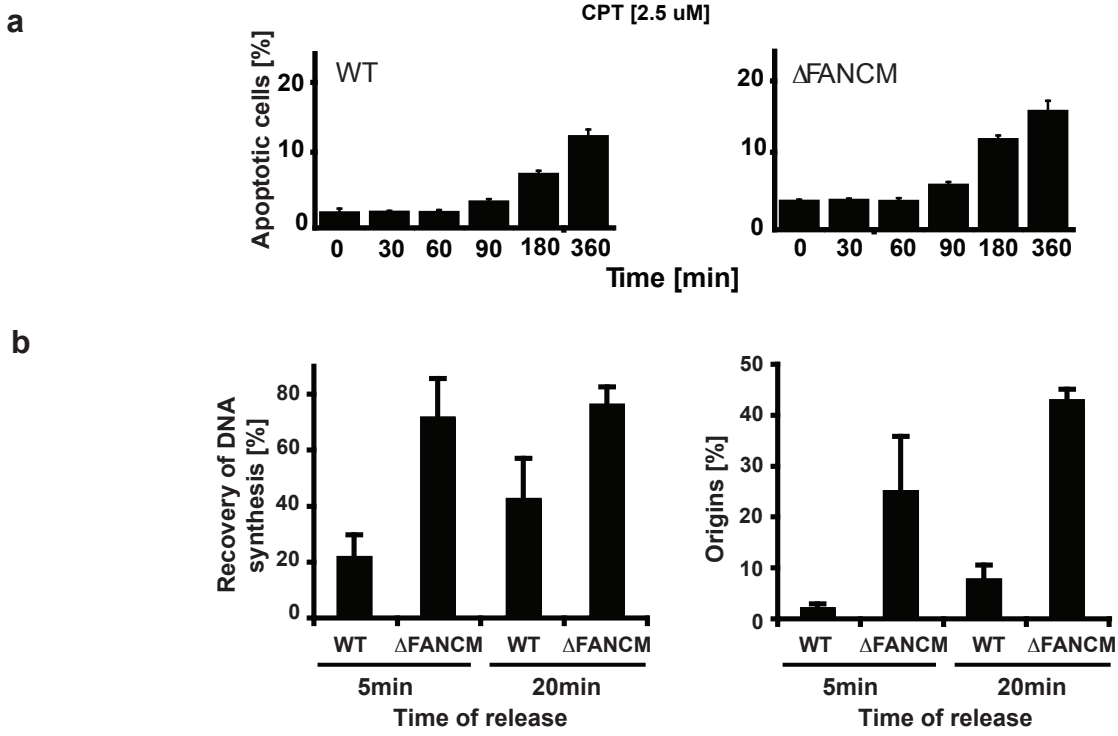

Supplementary Fig-2 Niedzwiedz

Supplement: emboj2009385s2.pdf [file emboj2009385s2.pdf]

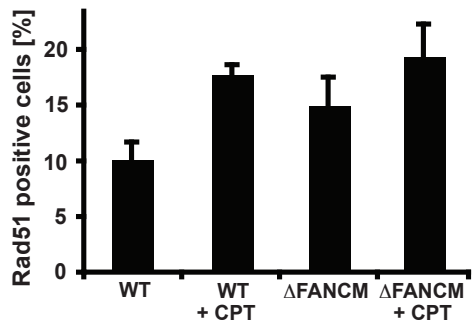

Supplementary Fig-3 Niedzwiedz

Supplement: emboj2009385s3.pdf [file emboj2009385s3.pdf]

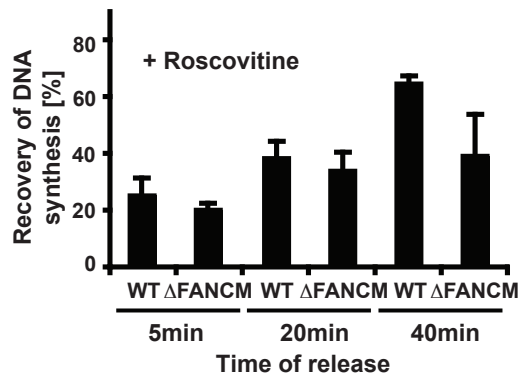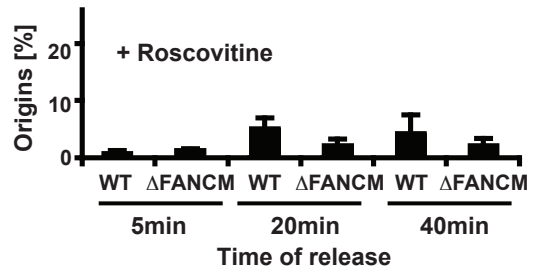

**Supplementary Fig-4 Niedzwiedz**

Supplement: emboj2009385s4.pdf [file emboj2009385s4.pdf]

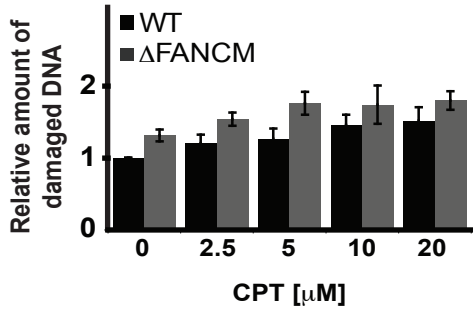

Supplementary Fig-5 Niedzwiedz

Supplement: emboj2009385s5.pdf [file emboj2009385s5.pdf]

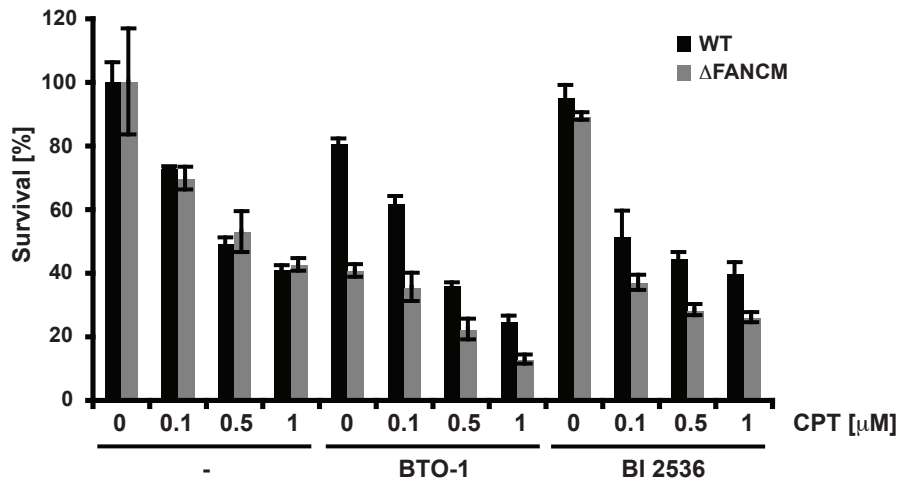

Supplementary Fig-6 Niedzwiedz

Supplement: emboj2009385s6.pdf [file emboj2009385s6.pdf]
